# Supplementary material for: Antioxidative and Anti-Inflammatory Protective Effects of Fucoxanthin against Paracetamol-Induced Hepatotoxicity in Rats
Source: MDPI journal article supplement (doi:10.3390/md21110592), 2023-11-14

## TNF- $\alpha$ protein Expression (17 KD)

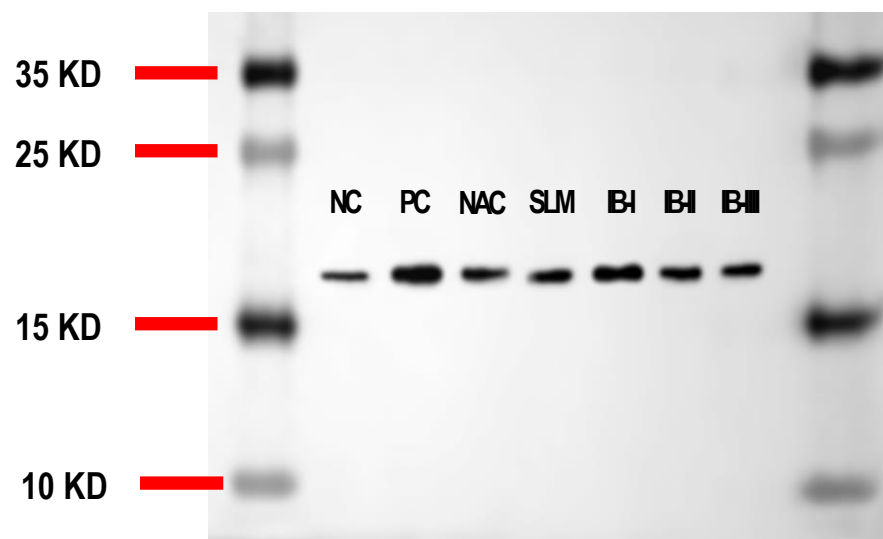

## IL-10 protein Expression (17 KD)

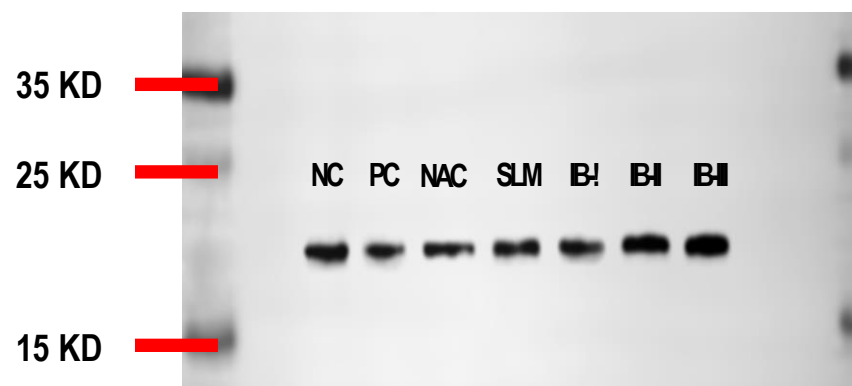

## IL-22 protein Expression (17 KD)

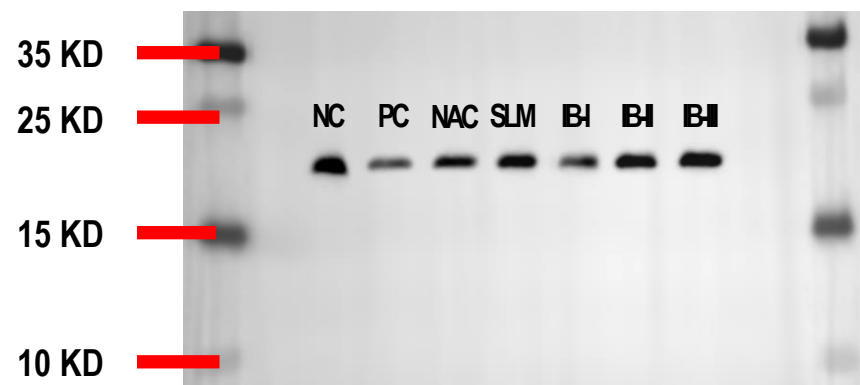

## CYP2E1 protein Expression (57 KD)

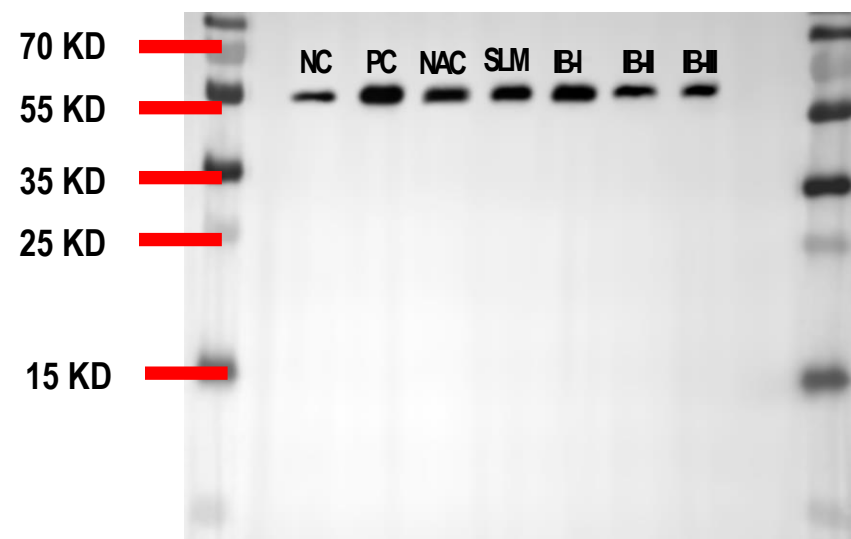

## CYP3A4 protein Expression (57 KD)

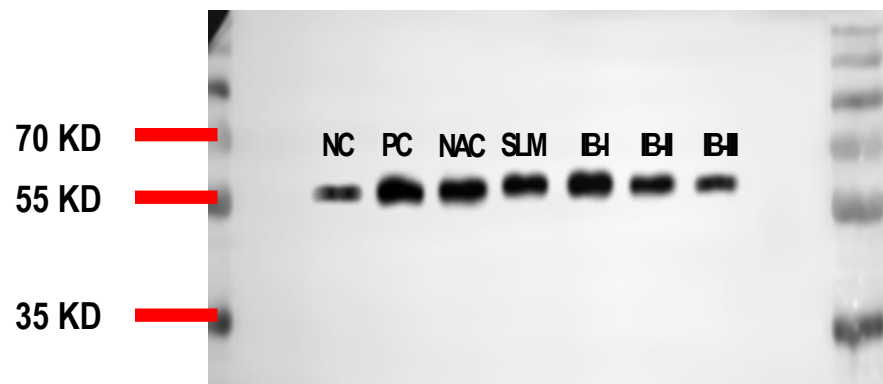

## BCL2 protein Expression (26 KD)

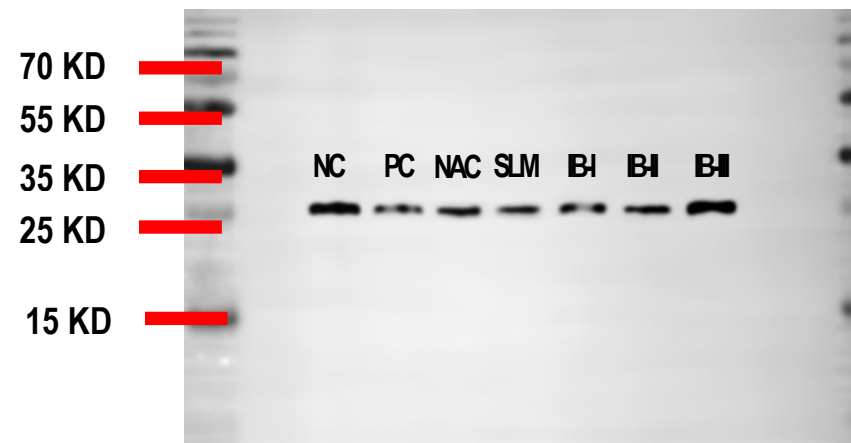

## PCNA protein Expression (36 KD)

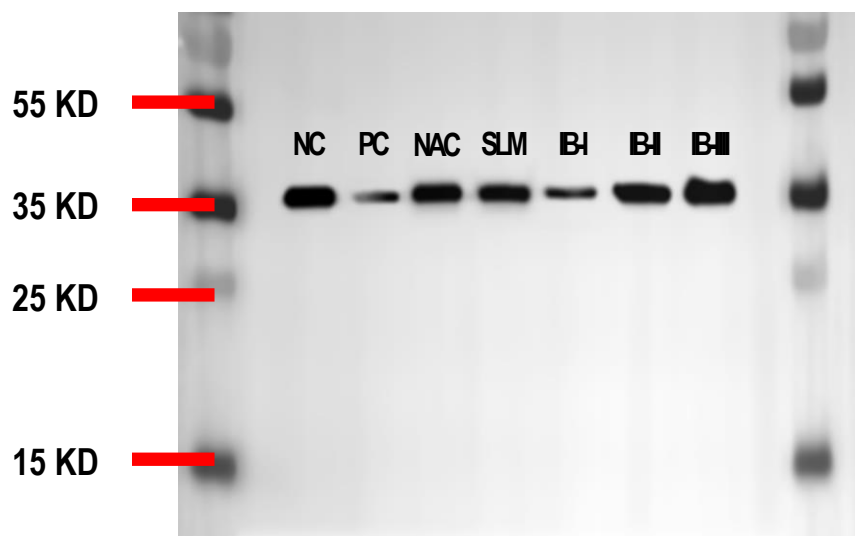

## Casp-3 protein Expression (17 KD)

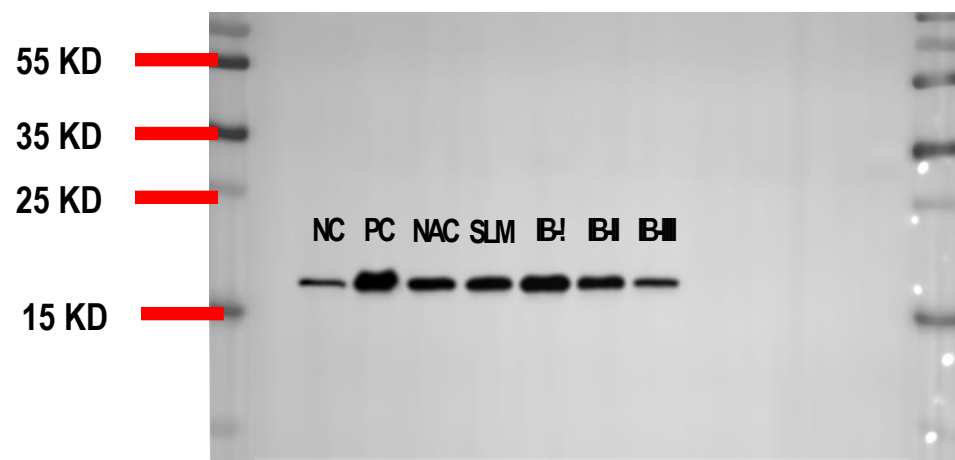

## GAPDH protein Expression (37 KD)

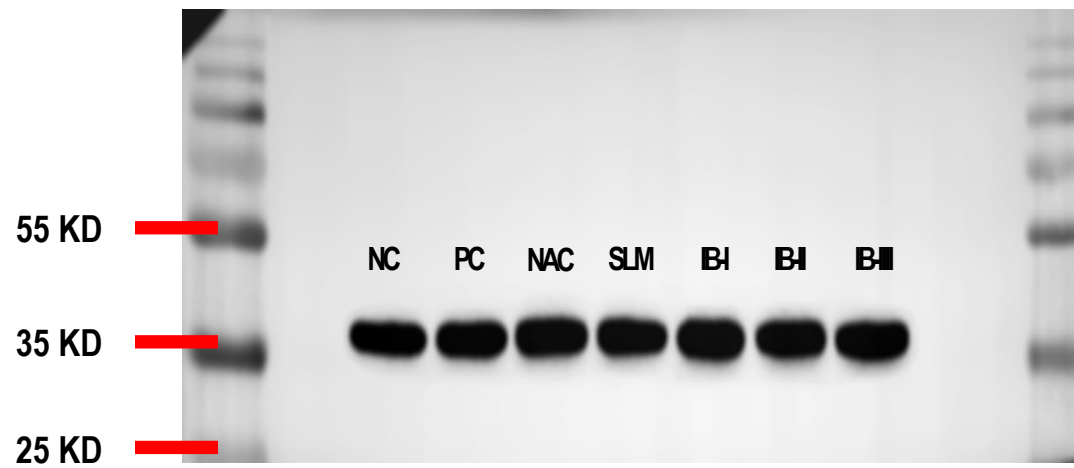

Supplement: s1 [file s1]
